# Supplementary material for: Molecular dynamics studies of disulfide bonds for enhancing the stability of serine protease PB92
Source: Royal Society of Chemistry journal article supplement (doi:10.1039/d3nj04676a), 2023-12-22
Supplement: d3nj04676a1.pdf [file d3nj04676a1.pdf]

## Supplementary Information

# Molecular Dynamics Studies of Disulfide Bonds for Enhancing the Stability of Serine Protease PB92

Guowei Zhao,<sup>ab</sup> Jian Zhang <sup>\*ab</sup>

- a. School of Chemistry and Chemical Engineering, Shanxi University, Taiyuan 030006, China. E-mail:  
zhangjian@sxu.edu.cn
- b. Engineering Research Center of Ministry of Education for Fine Chemicals, Shanxi University, Taiyuan 030006, China.

**Table S1** The results indicate that potential disulfide bond mutation sites exhibit superior stability compared to the wild-type screened by FoldX

|             | Total energy<br>(Kcal/mol) | Backbone Hbond<br>(Kcal/mol) | Van der Waals<br>(Kcal/mol) | Electrostatics<br>(Kcal/mol) | Disulfide<br>(Kcal/mol) |
|-------------|----------------------------|------------------------------|-----------------------------|------------------------------|-------------------------|
| Wild-Type   | 337.426                    | -97.900                      | -271.310                    | -3.39328                     | /                       |
| V148C-M169C | 331.374                    | -98.3861                     | -268.946                    | -3.24545                     | -3.30125                |
| T247C-A266C | 329.512                    | -98.7259                     | -271.466                    | -3.42761                     | -3.13302                |
| G116C-V145C | 281.728                    | -113.348                     | -266.786                    | -4.69662                     | -3.50429                |
| A173C-G196C | 321.934                    | -100.535                     | -271.564                    | -3.485                       | -3.36904                |
| N121C-A222C | 329.054                    | -97.4736                     | -271.423                    | -3.39926                     | -4.70725                |
| A71C-A86C   | 305.135                    | -102.455                     | -269.708                    | -3.73751                     | -3.03035                |
| G45C-Y89C   | 327.384                    | -99.0607                     | -270.143                    | -3.33747                     | -3.77936                |
| V50C-S104C  | 327.739                    | -98.3102                     | -270.721                    | -3.4327                      | -4.14667                |
| S48C-K92C   | 323.534                    | -97.4139                     | -268.987                    | -2.89956                     | -3.57904                |
| F49C-Q107C  | 325.15                     | -99.6695                     | -267.574                    | -3.43363                     | -4.16332                |
| T249C-L261C | 295.218                    | -104.363                     | -265.623                    | -3.82926                     | -2.70623                |
| G7C-V199C   | 318.13                     | -100.808                     | -271.137                    | -3.45575                     | -5.26571                |
| T247C-A267C | 325.858                    | -99.7812                     | -271.257                    | -3.46956                     | -3.1533                 |
| R44C-E87C   | 321.129                    | -98.7859                     | -268.752                    | -2.60212                     | -3.86395                |
| Q200C-S210C | 331.675                    | -97.8976                     | -270.757                    | -3.39315                     | -2.61689                |
